# Supplementary material
Source: MDPI journal article supplement (https://www.mdpi.com/2073-4395/11/5/970)
Supplement: s1 [file s1]

**File S1:** Adjusted and location-specific genotype means. Statistical analyses were performed including and excluding Bärnkrafft. Adjusted means were estimated by a mixed model for each trait, separately. Location-specific genotype means for dry matter content, plant height and stem diameter were estimated by a linear model, whereas Friedman Test was used for biomass score and inflorescence volume score. Genotypes with the same letter are not significantly different.

| Biomass score (BS) |            |                      |    |              |    |                |    |                      |     |              |    |                |    |
|--------------------|------------|----------------------|----|--------------|----|----------------|----|----------------------|-----|--------------|----|----------------|----|
|                    |            | Including Bärnkrafft |    |              |    |                |    | Excluding Bärnkrafft |     |              |    |                |    |
| Entry              | Genotype   | Heidfeldhof          |    | Eckartsweier |    | Adjusted Means |    | Heidfeldhof          |     | Eckartsweier |    | Adjusted Means |    |
| 1                  | Bärnkrafft | 3.0                  | d  | 3.0          | e  | 1.50           | e  | x                    |     | x            |    | x              |    |
| 2                  | 1101       | 20.0                 | bc | 21.5         | bc | 6.00           | bc | 17.0                 | bc  | 18.5         | bc | 6.00           | b  |
| 3                  | 1115       | 33.0                 | a  | 31.5         | a  | 8.17           | a  | 30.0                 | a   | 28.5         | a  | 8.17           | a  |
| 4                  | 1118       | 15.5                 | bc | 21.5         | bc | 5.83           | bc | 14.5                 | bc  | 18.5         | bc | 5.83           | b  |
| 5                  | 1231       | 25.0                 | ab | 18.5         | c  | 6.17           | bc | 22.0                 | ab  | 15.5         | c  | 6.17           | b  |
| 6                  | 1241       | 20.5                 | bc | 18.5         | c  | 5.83           | bc | 17.5                 | bc  | 15.5         | c  | 5.83           | b  |
| 7                  | 1245       | 7.0                  | d  | 6.5          | de | 3.50           | d  | 4.0                  | d   | 3.5          | d  | 3.50           | c  |
| 8                  | 1283       | 19.0                 | bc | 27.0         | ab | 6.33           | bc | 16.0                 | bc  | 24.0         | ab | 6.33           | b  |
| 9                  | 1290       | 24.5                 | ab | 11.0         | d  | 5.67           | bc | 21.5                 | ab  | 8.0          | d  | 5.67           | b  |
| 10                 | 1299       | 17.0                 | bc | 28.0         | a  | 6.33           | bc | 14.0                 | bcd | 25.0         | a  | 6.33           | b  |
| 11                 | 1396       | 11.5                 | cd | 11.0         | d  | 4.83           | cd | 8.5                  | cd  | 8.0          | d  | 4.83           | bc |

| Inflorescence Volume Score (IVS) |            |                      |      |              |      |                |     |                      |     |              |     |                |     |
|----------------------------------|------------|----------------------|------|--------------|------|----------------|-----|----------------------|-----|--------------|-----|----------------|-----|
|                                  |            | Including Bärnkrafft |      |              |      |                |     | Excluding Bärnkrafft |     |              |     |                |     |
| Entry                            | Genotype   | Heidfeldhof          |      | Eckartsweier |      | Adjusted Means |     | Heidfeldhof          |     | Eckartsweier |     | Adjusted Means |     |
| 1                                | Bärnkrafft | 24.0                 | a    | 29.0         | ab   | 6.83           | ab  | x                    |     | x            |     | x              |     |
| 2                                | 1101       | 30.5                 | a    | 31.5         | a    | 7.67           | a   | 27.5                 | a   | 29.5         | a   | 7.67           | a   |
| 3                                | 1115       | 7.0                  | e    | 9.5          | d    | 3.67           | e   | 7.0                  | d   | 9.5          | d   | 3.67           | e   |
| 4                                | 1118       | 20.0                 | abc  | 20.5         | abcd | 5.83           | bc  | 19.5                 | ab  | 19.5         | ab  | 5.83           | bc  |
| 5                                | 1231       | 22.0                 | ab   | 15.5         | cd   | 5.67           | bc  | 20.5                 | ab  | 15.5         | ab  | 5.67           | bcd |
| 6                                | 1241       | 19.0                 | abcd | 17.0         | bcd  | 5.50           | bcd | 18.0                 | abc | 16.5         | abc | 5.50           | bcd |
| 7                                | 1245       | 10.0                 | cde  | 10.0         | d    | 4.00           | de  | 10.0                 | bcd | 10.0         | bcd | 4.00           | de  |
| 8                                | 1283       | 10.5                 | bcde | 9.5          | d    | 4.00           | de  | 10.0                 | bcd | 9.5          | bcd | 4.00           | de  |
| 9                                | 1290       | 25.0                 | a    | 13.5         | cd   | 5.83           | bc  | 23.5                 | a   | 13.5         | a   | 5.83           | bc  |
| 10                               | 1299       | 7.5                  | de   | 17.0         | bcd  | 4.33           | ce  | 7.5                  | cd  | 17.0         | cd  | 4.33           | ce  |
| 11                               | 1396       | 22.5                 | a    | 25.0         | abc  | 6.17           | ab  | 21.7                 | a   | 24.5         | a   | 6.17           | ab  |

| Plant height (PH) [cm] |            |                      |    |              |    |                |    |                      |    |              |    |                |    |
|------------------------|------------|----------------------|----|--------------|----|----------------|----|----------------------|----|--------------|----|----------------|----|
|                        |            | Including Bärnkrafft |    |              |    |                |    | Excluding Bärnkrafft |    |              |    |                |    |
| Entry                  | Genotype   | Heidfeldhof          |    | Eckartsweier |    | Adjusted Means |    | Heidfeldhof          |    | Eckartsweier |    | Adjusted Means |    |
| 1                      | Bärnkrafft | 107.11               | e  | 111.81       | f  | 109.46         | e  | x                    |    | x            |    | x              |    |
| 2                      | 1101       | 211.96               | ab | 246.96       | ac | 229.46         | ab | 211.96               | ab | 246.96       | ac | 229.46         | ab |
| 3                      | 1115       | 239.60               | a  | 267.12       | a  | 253.36         | a  | 239.60               | a  | 267.12       | a  | 253.36         | a  |
| 4                      | 1118       | 175.43               | d  | 215.85       | cd | 195.64         | bd | 175.43               | c  | 215.85       | cd | 195.64         | bd |
| 5                      | 1231       | 208.27               | bc | 230.66       | bc | 219.47         | ab | 208.27               | ab | 230.66       | bc | 219.47         | ab |
| 6                      | 1241       | 200.64               | bd | 222.42       | c  | 211.53         | bc | 200.64               | bc | 222.42       | c  | 211.53         | bc |
| 7                      | 1245       | 171.15               | d  | 151.56       | e  | 161.36         | d  | 171.15               | c  | 151.56       | e  | 161.36         | d  |
| 8                      | 1283       | 201.71               | bd | 232.12       | bc | 216.91         | b  | 201.71               | bc | 232.12       | bc | 216.91         | b  |
| 9                      | 1290       | 171.24               | d  | 185.12       | d  | 178.18         | cd | 171.24               | c  | 185.12       | d  | 178.18         | cd |
| 10                     | 1299       | 189.44               | bd | 259.97       | ab | 224.70         | ab | 189.44               | bc | 259.97       | ab | 224.70         | ab |
| 11                     | 1396       | 179.59               | cd | 218.18       | c  | 198.88         | bc | 179.59               | bc | 218.18       | cd | 198.88         | bc |

| Stem diameter (SD) [mm] |            |                      |    |              |      |                |    |                      |    |              |      |                |    |
|-------------------------|------------|----------------------|----|--------------|------|----------------|----|----------------------|----|--------------|------|----------------|----|
|                         |            | Including Bärnkrafft |    |              |      |                |    | Excluding Bärnkrafft |    |              |      |                |    |
| Entry                   | Genotype   | Heidfeldhof          |    | Eckartsweier |      | Adjusted Means |    | Heidfeldhof          |    | Eckartsweier |      | Adjusted Means |    |
| 1                       | Bärnkrafft | 15.18                | c  | 13.40        | f    | 14.29          | e  | x                    |    | x            |      | x              |    |
| 2                       | 1101       | 20.67                | ab | 21.07        | ab   | 20.87          | ab | 20.67                | ab | 21.07        | ab   | 20.87          | ab |
| 3                       | 1115       | 19.52                | b  | 15.82        | cdf  | 17.67          | cd | 19.52                | b  | 15.82        | cde  | 17.67          | cd |
| 4                       | 1118       | 17.16                | bc | 17.49        | bcde | 17.33          | cd | 17.16                | bc | 17.49        | bcde | 17.33          | cd |
| 5                       | 1231       | 24.61                | a  | 22.30        | a    | 23.46          | a  | 24.61                | a  | 22.30        | a    | 23.46          | a  |
| 6                       | 1241       | 17.83                | bc | 18.66        | ad   | 18.25          | bc | 17.83                | bc | 18.66        | ad   | 18.25          | bc |
| 7                       | 1245       | 14.68                | c  | 15.13        | df   | 14.91          | de | 14.68                | c  | 15.13        | de   | 14.91          | d  |
| 8                       | 1283       | 19.60                | b  | 16.82        | cdf  | 18.21          | bc | 19.60                | b  | 16.82        | cde  | 18.21          | bc |
| 9                       | 1290       | 17.03                | bc | 14.44        | ef   | 15.74          | ce | 17.03                | bc | 14.44        | e    | 15.74          | cd |
| 10                      | 1299       | 17.03                | bc | 19.37        | ac   | 18.20          | bc | 17.03                | bc | 19.37        | ac   | 18.20          | bc |
| 11                      | 1396       | 20.82                | ab | 21.20        | ab   | 21.01          | ab | 20.82                | ab | 21.20        | ab   | 21.01          | ab |

| Dry matter content (DMC) [%] |            |                      |     |              |     |                |    |                      |    |              |    |                |    |
|------------------------------|------------|----------------------|-----|--------------|-----|----------------|----|----------------------|----|--------------|----|----------------|----|
|                              |            | Including Bärnkrafft |     |              |     |                |    | Excluding Bärnkrafft |    |              |    |                |    |
| Entry                        | Genotype   | Heidfeldhof          |     | Eckartsweier |     | Adjusted Means |    | Heidfeldhof          |    | Eckartsweier |    | Adjusted Means |    |
| 1                            | Bärnkrafft | 26.59                | a   | 22.37        | a   | 24.48          | a  | x                    |    | x            |    | x              |    |
| 2                            | 1101       | 22.93                | be  | 21.57        | ac  | 22.25          | b  | 22.93                | ac | 21.57        | ab | 22.25          | ab |
| 3                            | 1115       | 22.58                | be  | 20.98        | ad  | 21.78          | b  | 22.58                | ac | 20.98        | ac | 21.78          | ab |
| 4                            | 1118       | 23.14                | be  | 20.93        | ad  | 22.04          | b  | 23.14                | ac | 20.93        | ac | 22.04          | ab |
| 5                            | 1231       | 21.34                | e   | 17.84        | e   | 19.59          | c  | 21.34                | c  | 17.84        | d  | 19.59          | c  |
| 6                            | 1241       | 24.44                | b   | 20.02        | cd  | 22.23          | b  | 24.44                | a  | 20.02        | bc | 22.23          | ab |
| 7                            | 1245       | 23.95                | bc  | 21.90        | ab  | 22.93          | ab | 23.95                | ab | 21.90        | a  | 22.93          | a  |
| 8                            | 1283       | 21.68                | de  | 20.31        | bcd | 20.99          | bc | 21.68                | c  | 20.31        | ac | 20.99          | bc |
| 9                            | 1290       | 22.55                | be  | 21.25        | ad  | 21.90          | b  | 22.55                | ac | 21.25        | ac | 21.90          | ab |
| 10                           | 1299       | 22.25                | cd  | 20.74        | ad  | 21.50          | bc | 22.25                | bc | 20.74        | ac | 21.50          | ab |
| 11                           | 1396       | 23.36                | bcd | 19.68        | d   | 21.52          | bc | 23.36                | ac | 19.68        | c  | 21.52          | ab |
