# Supplementary material
Source: MDPI journal article supplement (https://www.mdpi.com/2073-4395/11/5/970)
Supplement: s1 [file s1]

**Table S1:** Location-specific variance analyses (Type 3 tests of fixed effects) for dry matter content, plant height and stem diameter and Friedman tests for biomass and inflorescence volume score, with biomass yield components as dependent variables and genotype as fixed effect, including and excluding Bärnkrafft. Locations are Heidfeldhof and Eckartsweier, respectively.

| Including Bärnkrafft       |                                    |          |             |                      |                        |       |       |                                    |         |                          |           |                        |       |       |
|----------------------------|------------------------------------|----------|-------------|----------------------|------------------------|-------|-------|------------------------------------|---------|--------------------------|-----------|------------------------|-------|-------|
| Traits                     | Heidfeldhof                        |          |             |                      |                        |       |       | Eckartsweier                       |         |                          |           |                        |       |       |
|                            | Type 3 Tests for Genotype Effect   |          |             |                      | Descriptive Statistics |       |       | Type 3 Tests for Genotype Effect   |         |                          |           | Descriptive Statistics |       |       |
|                            | Num DF                             | Den DF   | F-Value     | Pr>F                 | Mean                   | ±     | SE    | Num DF                             | Den DF  | F-Value                  | Pr>F      | Mean                   | ±     | SE    |
| Dry matter content (%)     | 10                                 | 20       | 4.51        | 0.002**              | 23.16                  | ±     | 0.44  | 10                                 | 20      | 4.70                     | 0.0016**  | 20.69                  | ±     | 0.37  |
| Plant height (cm)          | 10                                 | 20       | 10.27       | <.0001***            | 186.92                 | ±     | 10.14 | 10                                 | 20      | 19.06                    | <.0001*** | 212.89                 | ±     | 14.10 |
| Stem diameter (mm)         | 10                                 | 20       | 4.25        | 0.0029**             | 18.56                  | ±     | 0.86  | 10                                 | 20      | 5.02                     | 0.0011**  | 17.79                  | ±     | 0.90  |
|                            | Friedman Tests for Genotype Effect |          |             |                      | Descriptive Statistics |       |       | Friedman Tests for Genotype Effect |         |                          |           | Descriptive Statistics |       |       |
|                            | DF                                 | Chi-sq   | P-Value     |                      | Median                 | IQR   |       | DF                                 | Chi-sq  | P-Value                  |           | Median                 | IQR   |       |
|                            |                                    |          |             |                      |                        |       |       |                                    |         |                          |           |                        |       |       |
| Biomass score              | 10                                 | 23.05466 | 0.0105466*  |                      | 19                     | 8.25  |       | 10                                 | 27.4309 | 0.002225102**            |           | 18.5                   | 13.25 |       |
| Inflorescence volume score | 10                                 | 20.19108 | 0.0274963*  |                      | 20                     | 13    |       | 10                                 | 18.9348 | 0.04109846*              |           | 17                     | 11    |       |
| Excluding Bärnkrafft       |                                    |          |             |                      |                        |       |       |                                    |         |                          |           |                        |       |       |
| Traits                     | Heidfeldhof                        |          |             |                      |                        |       |       | Eckartsweier                       |         |                          |           |                        |       |       |
|                            | Type 3 Tests for Genotype Effect   |          |             |                      | Descriptive Statistics |       |       | Type 3 Tests for Genotype Effect   |         |                          |           | Descriptive Statistics |       |       |
|                            | Num DF                             | Den DF   | F-Value     | Pr>F                 | Mean                   | ±     | SE    | Num DF                             | Den DF  | F-Value                  | Pr>F      | Mean                   | ±     | SE    |
| Dry matter content (%)     | 9                                  | 18       | 1.78        | 0.1418 <sup>ns</sup> | 22.82                  | ±     | 0.30  | 9                                  | 18      | 3.78                     | 0.0079**  | 20.52                  | ±     | 0.37  |
| Plant height (cm)          | 9                                  | 18       | 3.97        | 0.0062**             | 194.90                 | ±     | 6.92  | 9                                  | 18      | 9.44                     | <.0001*** | 223.00                 | ±     | 10.87 |
| Stem diameter (mm)         | 9                                  | 18       | 3.78        | 0.0071**             | 18.89                  | ±     | 0.88  | 9                                  | 18      | 3.82                     | 0.0075**  | 18.23                  | ±     | 0.86  |
|                            | Friedman Tests for Genotype Effect |          |             |                      | Descriptive Statistics |       |       | Friedman Tests for Genotype Effect |         |                          |           | Descriptive Statistics |       |       |
|                            | DF                                 | Chi-sq   | P-Value     |                      | Median                 | IQR   |       | DF                                 | Chi-sq  | P-Value                  |           | Median                 | IQR   |       |
|                            |                                    |          |             |                      |                        |       |       |                                    |         |                          |           |                        |       |       |
| Biomass score              | 9                                  | 18.49234 | 0.0298726*  |                      | 16.5                   | 6.375 |       | 9                                  | 23.84   | 0.004561565**            |           | 17                     | 12.75 |       |
| Inflorescence volume score | 9                                  | 18.07563 | 0.03430616* |                      | 18.75                  | 11.25 |       | 9                                  | 15.1609 | 0.08660893 <sup>ns</sup> |           | 16                     | 8     |       |

\*, \*\*, \*\*\* significant at  $p < 0.05$ ,  $p < 0.01$  and  $p < 0.001$ , respectively, whereas <sup>ns</sup> shows non-significance. IQR indicates inter-quartile range.
